# Supplementary material for: Evolutionary-Related High- and Low-Virulent Classical Swine Fever Virus Isolates Reveal Viral Determinants of Virulence
Source: MDPI journal article supplement (doi:10.3390/v16010147), 2024-01-19
Supplement: s1 [file s1]

## Article

# Evolutionary-Related High- and Low-Virulent Classical Swine Fever Virus Isolates Reveal Viral Determinants of Virulence

Yoandry Hinojosa <sup>1,2,3,4</sup>, Matthias Liniger <sup>1,2</sup>, Obdulio García-Nicolás <sup>1,2</sup>, Markus Gerber <sup>1,2</sup>, Anojen Rajaratnam <sup>1,2</sup>, Sara Muñoz-González <sup>5,6</sup>, Liani Coronado <sup>5,6,7</sup>, María Teresa Frías <sup>4</sup>, Carmen Laura Perera <sup>4</sup>, Lillianne Ganges <sup>5,6,7</sup> and Nicolas Ruggli <sup>1,2,\*</sup>

<sup>1</sup> Division of Virology, Institute of Virology and Immunology IVI, 3147 Mittelhäusern, Switzerland; yoandri11@yahoo.es (Y.H.); matthias.liniger@ivi.admin.ch (M.L.); obdulio.garcia-nicolas@ivi.admin.ch (O.G.-N.); markus.gerber@ivi.admin.ch (M.G.)

<sup>2</sup> Department of Infectious Diseases and Pathobiology (DIP), University of Bern, 3012 Bern, Switzerland

<sup>3</sup> Graduate School for Cellular and Biomedical Sciences (GCB), University of Bern, 3012 Bern, Switzerland

<sup>4</sup> Centro Nacional de Sanidad Agropecuaria (CENSA), San José de las Lajas 32700, Cuba; friaslepoureau@gmail.com (M.T.F.); claura@censa.edu.cu (C.L.P.)

<sup>5</sup> WOA Reference Laboratory for Classical Swine Fever, IRTA-CReSA, 08193 Barcelona, Spain; s.munoz@vidium-solutions.com (S.M.-G.); liani.coronado@irta.cat (L.C.); lillianne.ganges@irta.cat (L.G.)

<sup>6</sup> Unitat Mixta d'Investigació IRTA-UAB en Sanitat Animal, Centre de Recerca en Sanitat Animal (CReSA), 08193 Barcelona, Spain

<sup>7</sup> IRTA, Programa de Sanitat Animal, Centre de Recerca en Sanitat Animal (CReSA), 08193 Barcelona, Spain

\* Correspondence: nicolas.ruggli@ivi.admin.ch

**Table S1.** Oligonucleotides used to amplify six overlapping PCR fragments for sequencing and assembly of the Margarita cDNA (5' and 3' ends determined by RACE, see Materials and Methods).

| Fragment (size) | Position <sup>1</sup> | Primer name | Primer sequence <sup>2</sup> |
|-----------------|-----------------------|-------------|------------------------------|
| F1 (2590bp)     | 228-246               | P-228-F     | GTGGACGAGGGCATGCCCCA         |
|                 | 2798-2817             | gvPdR-R4    | TAGAAAGCACTACCGTTCAG         |
| F2 (2393 bp)    | 2266-2285             | gvPdR-F3    | GTTATTTGAAGAGGCAGAAC         |
|                 | 4639-4658             | gvPdR-R7    | TGACAACGAAGAAGTTAGAG         |
| F3 (2999 bp)    | 3509-3528             | P-3509-F    | CTGTGGCTAATAGTGACCTA         |
|                 | 6488-6507             | P-6509-R    | GATTCTATCGCGTTGGTTGC         |
| F4 (2861 bp)    | 6221-6240             | P-6221-F    | GGGCAGAAACACCCTATAGA         |
|                 | 9062-9081             | P-9082-R    | <u>GTTATTCTTGTGTACCAATTC</u> |
| F5 (3289 bp)    | 8750-8769             | P-8750-F    | CCAGTGATAAGAATGGAAGG         |
|                 | 12019-12038           | gvPdR-R17   | TGACTCTCAGCCTCCTTAAC         |
| F6 (1796 bp)    | 10497-10516           | gvPdR-F15   | TGAAACGACCCGAGTTAGAG         |
|                 | 12270-12292           | P-12292-R   | TTAGGAAATTTACCTTAGTCCAAC     |

<sup>1</sup> Position in the Margarita genome, GenBank accession number [pending; submission ID 2778143].

<sup>2</sup> Sequence based on the PdR sequence, GenBank accession number KX576461. Retrospective mismatches with the PdR sequence are underlined.

**Table S2.** CSFV complete genome sequences selected for the phylogenetic analysis of Figure 1b

| GenBank accession number <sup>1</sup> | CSFV strain <sup>2</sup>               | Subgenotype <sup>2</sup> |
|---------------------------------------|----------------------------------------|--------------------------|
| X87939.1                              | Alfort/187                             | 1.1                      |
| AF092448.2                            | Shimen                                 | 1.1                      |
| AY259122.1                            | Riems                                  | 1.1                      |
| M31768.1                              | Brescia                                | 1.2                      |
| KJ873238.1                            | Rovac                                  | 1.2                      |
| AY578688.1                            | RUCSFPLUM                              | 1.2                      |
| MG655308.1                            | Guatemala                              | 1.3                      |
| OR997840.1                            | CSFV/Margarita/1958                    | 1.4                      |
| KX576461.1                            | CSFV/1.4/dp/CSF1058/2010/Pinar del Rio | 1.4                      |
| GQ923951.1                            | SXCDK                                  | 2.1                      |
| HQ148063.1                            | CSFV/2.1/dp/CSF1048/2009/LT/Penevezys  | 2.1                      |
| KY290453.1                            | CSFV/swine/S.Korea/YC16CS/2016         | 2.1                      |
| JX218094.1                            | HNSD-2012                              | 2.1                      |
| MH979231.1                            | HY78                                   | 2.1                      |
| JQ861548.3                            | CSFV-UP-GZ-NVD-11                      | 2.2                      |
| KC851953.1                            | CSFV_IND/UK/LAL-290                    | 2.2                      |
| MH979232.1                            | ND20                                   | 2.2                      |
| GU233731.1                            | CSFV/2.3/dp/CSF857/2006/Borken         | 2.3                      |
| GU233733.1                            | CSFV/2.3/wb/CSF1046/2009/Hennef        | 2.3                      |
| GU324242.1                            | CSFV/2.3/wb/XXX0609/2004/Uelzen        | 2.3                      |
| HQ148062.1                            | CSFV/2.3/dp/CSF864/2007/BG/Jambul      | 2.3                      |
| KF669877.1                            | JJ9811                                 | 3.2                      |
| KT716271.1                            | YI9908                                 | 3.2                      |
| AY646427.1                            | 94.4/IL/94/TWN                         | 3.4                      |
| L49347.1 <sup>3</sup>                 | P97                                    | 3.4                      |

<sup>1</sup> Version used in the phylogenetic tree<sup>2</sup> The CSFV strains were selected to cover the three genotypes and the major subgenotypes for which complete genome sequences were available.<sup>3</sup> Incomplete 5' and 3' ends

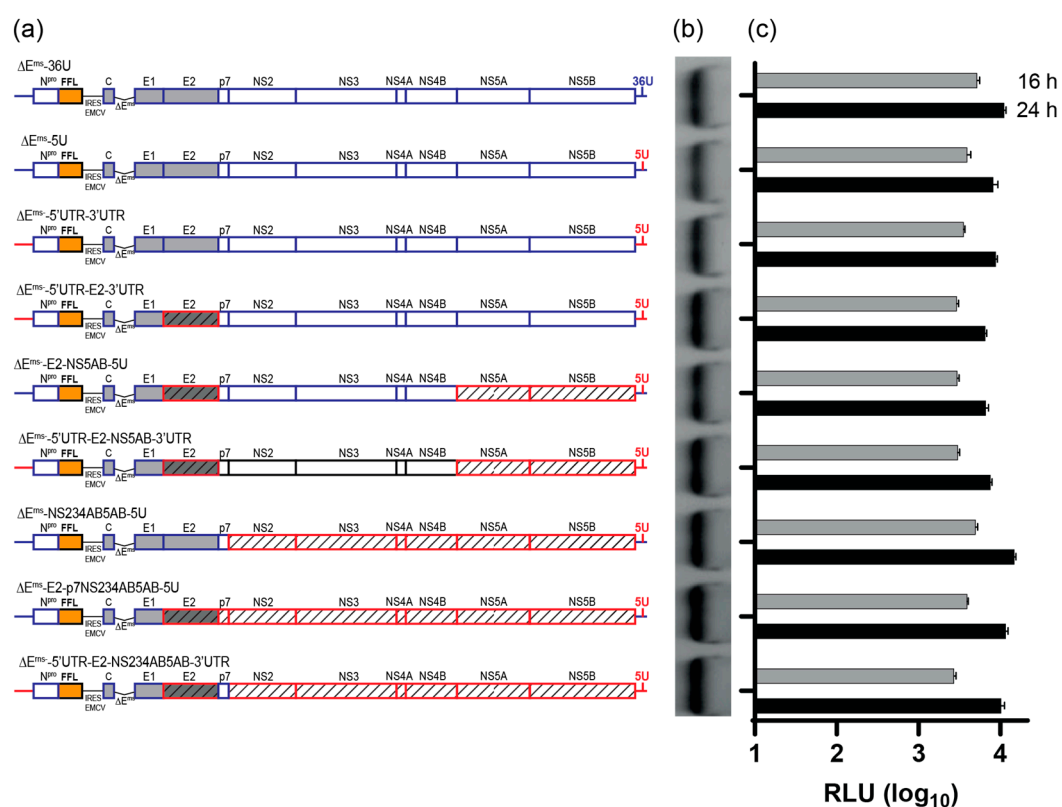

**Figure S1.** Firefly luciferase (FFL) expression from replicons of PdR ( $\Delta E^{ms}-36U$ ) and Margarita ( $\Delta E^{ms}-5'UTR-E2-NS234AB5AB-3'UTR$ ) and from chimera thereof in PEDSV.15 cells does not reflect the difference of virulence observed *in vivo*. **(a)** Schematic representation of the bicistronic replicons encoding FFL and lacking the  $E^{ms}$  gene ( $\Delta E^{ms}$ ) in the second ORF downstream of the internal ribosomal entry site of encephalomyocarditis virus (IRES EMCV), with gene elements from vMargarita (red) in the PdR backbone (blue). **(b)** Analysis of T7 *in vitro* transcripts (0.5  $\mu$ g/lane) of the replicons by agarose gel electrophoresis. **(c)** FFL activity of each replicon at 16- and 24-hours post-transfection of PEDSV.15 cells. FFL was normalized for transfection efficiency by flow cytometry against E2 protein. Bars represent the mean of triplicate transfections, with error bars showing the SD.
